# Supplementary material for: One year cross-sectional study in adult and neonatal intensive care units reveals the bacterial and antimicrobial resistance genes profiles in patients and hospital surfaces
Source: PubMed Central journal article supplement (PMC7269242; doi:10.1371/journal.pone.0234127), 2020-06-03
Supplement: pone.0234127.s001.pdf [file pone.0234127.s001.pdf]

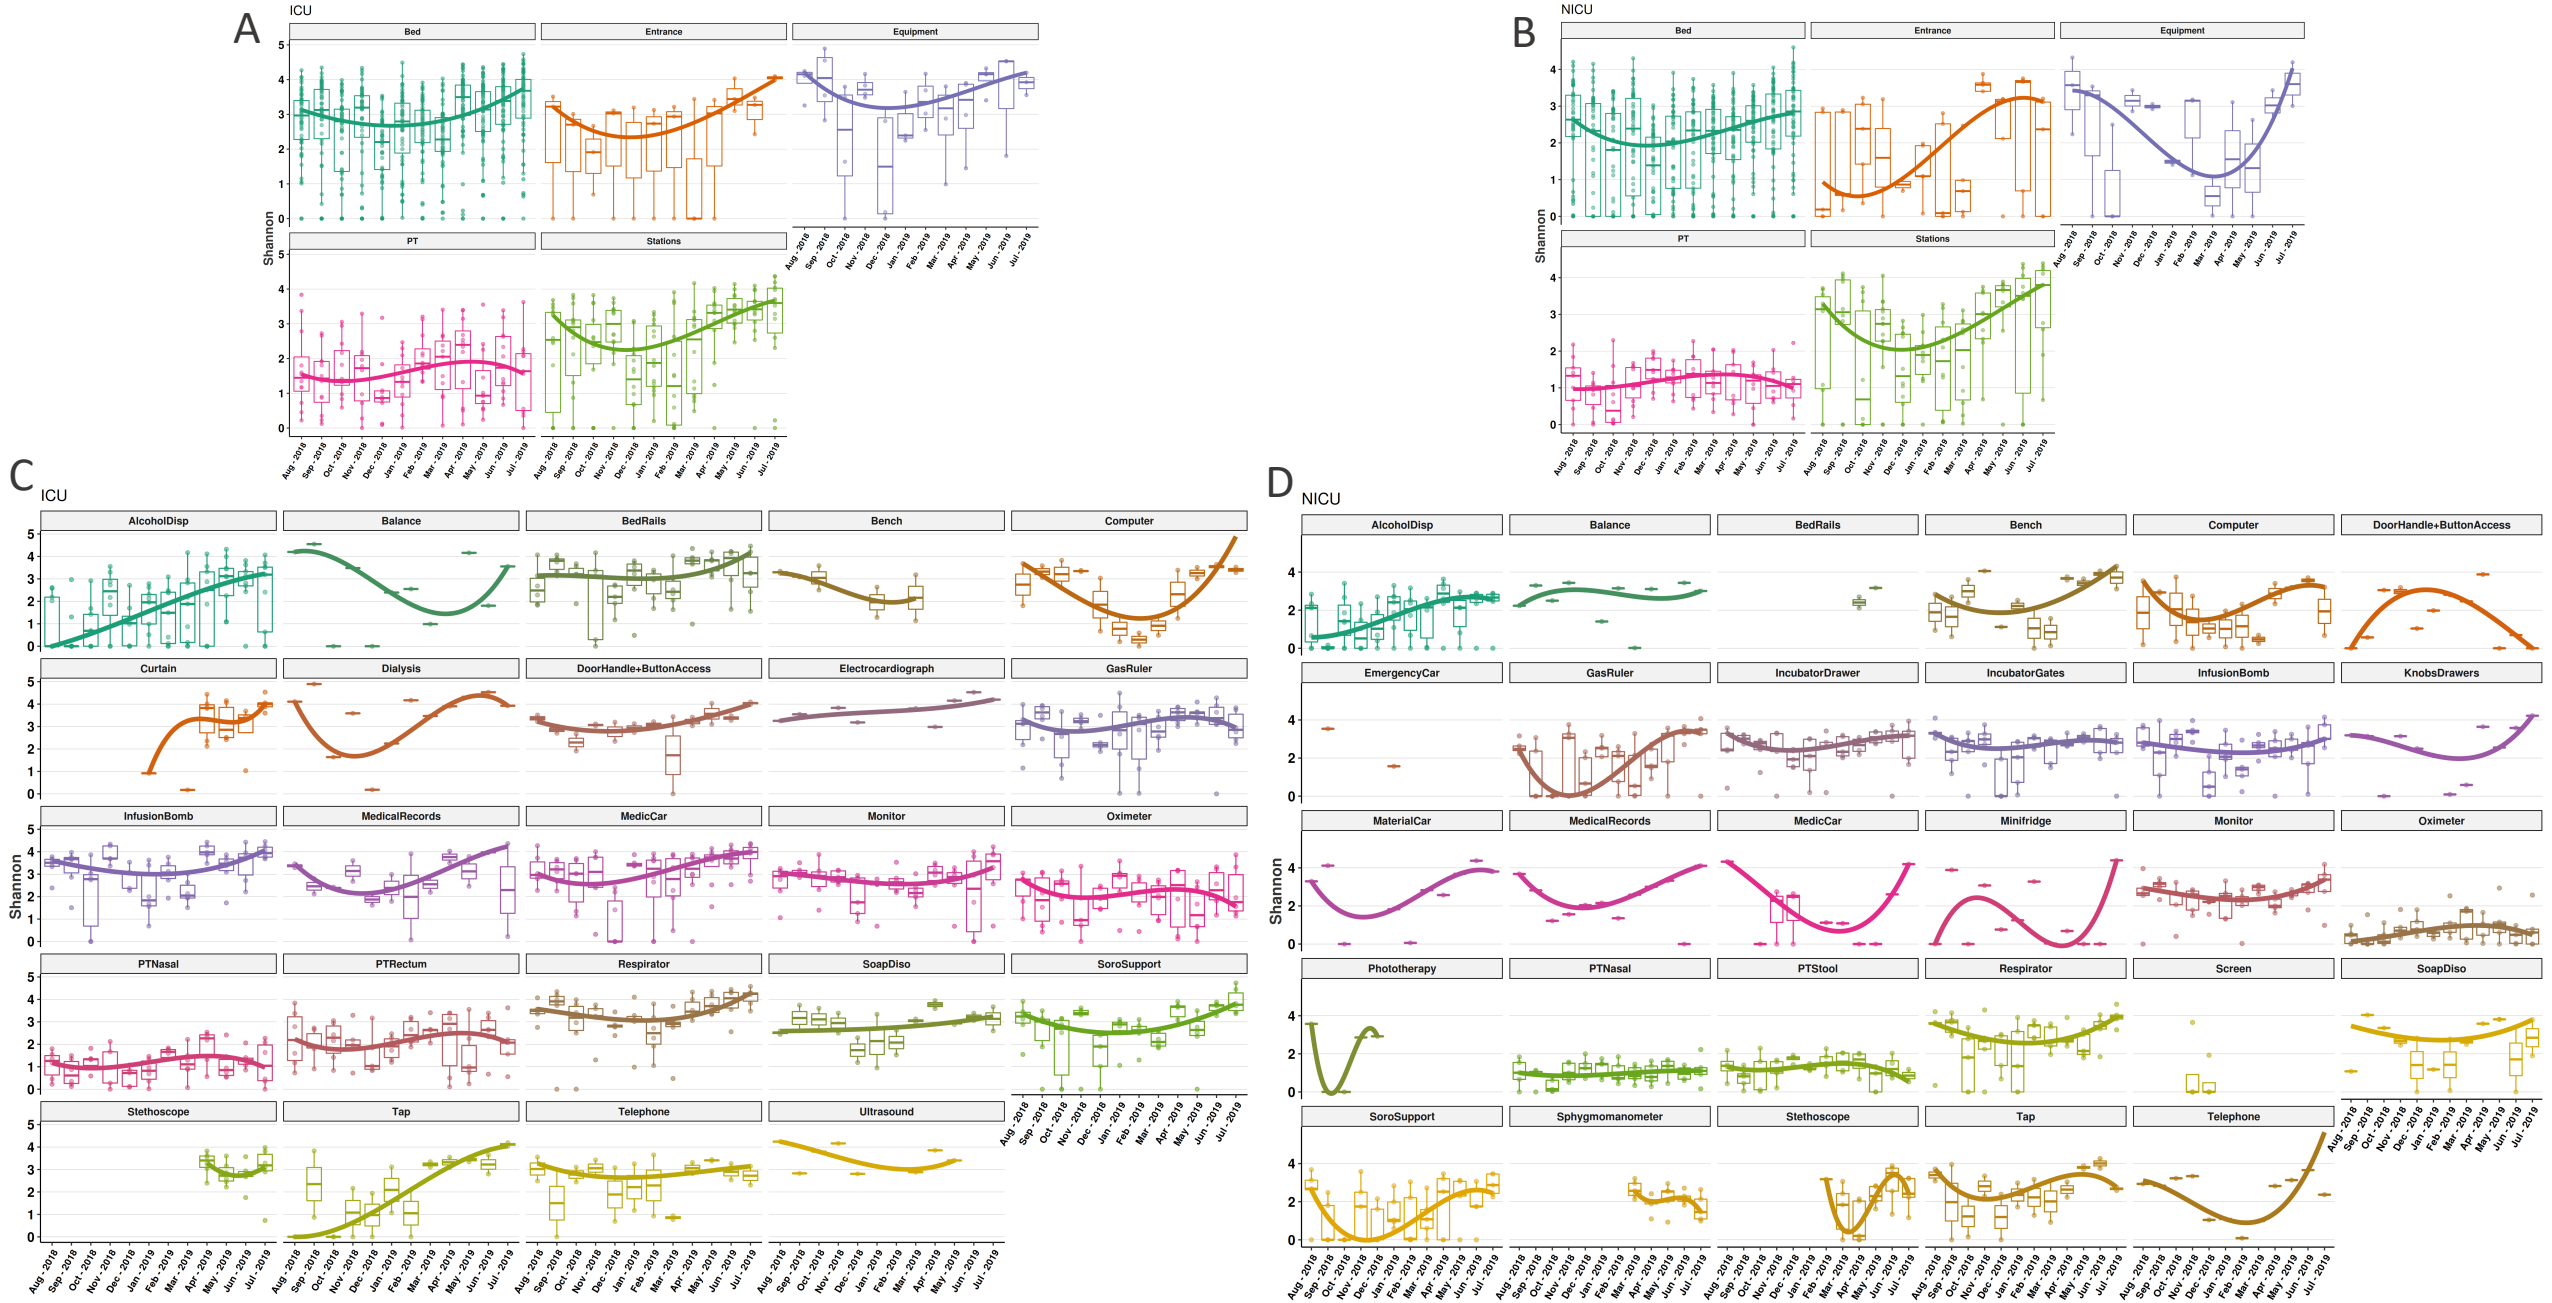

**S1 Fig.** Shannon diversity index profiles considering all samples from **(A)** ICU and **(B)** NICU in each month of analysis and sample collection locations: Bed, Entrance, Equipment, Patient (PT) and Stations. Shannon index for specific site collection in each intensive care unit **(C)** ICU and **(D)** NICU in each month. Boxplots were represented by median values and with a trend line for diversity index values over the year.
