# Supplementary material for: One year cross-sectional study in adult and neonatal intensive care units reveals the bacterial and antimicrobial resistance genes profiles in patients and hospital surfaces
Source: PubMed Central journal article supplement (PMC7269242; doi:10.1371/journal.pone.0234127), 2020-06-03

**S2 Fig.** Weighted UniFrac Beta-diversity PCoA plots for all samples collected in both units, ICU and NICU separated in three different timelines for better visualization, **(A)** from Aug-2018 to Nov-2018, **(B)** Dez-2018 to Feb-2019 and **(C)** Apr-2019 to Jul-2019.

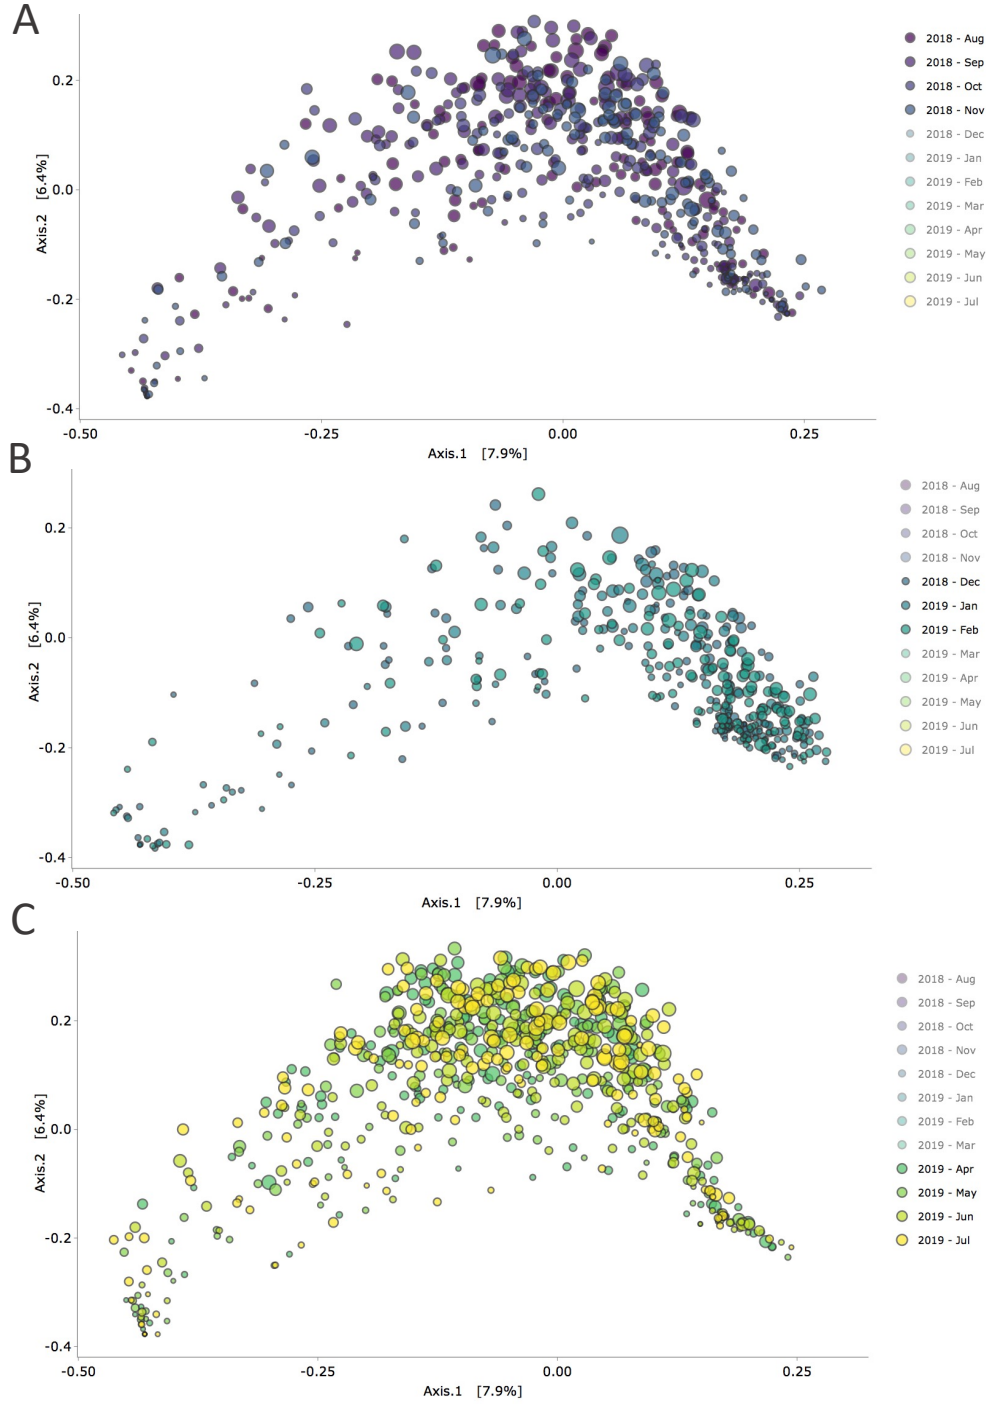

Supplement: pone.0234127.s002.pdf [file pone.0234127.s002.pdf]
