# Supplementary material for: One year cross-sectional study in adult and neonatal intensive care units reveals the bacterial and antimicrobial resistance genes profiles in patients and hospital surfaces
Source: PubMed Central journal article supplement (PMC7269242; doi:10.1371/journal.pone.0234127), 2020-06-03
Supplement: pone.0234127.s003.pdf [file pone.0234127.s003.pdf]

## Genus

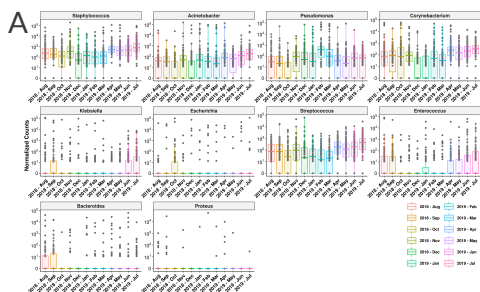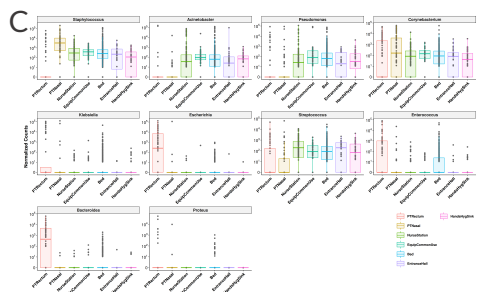

## Species

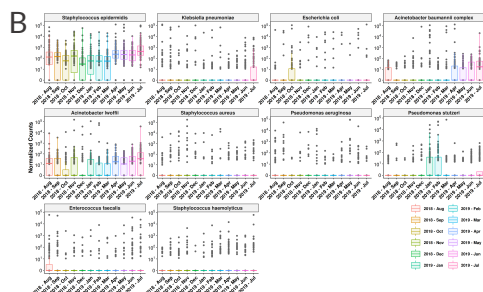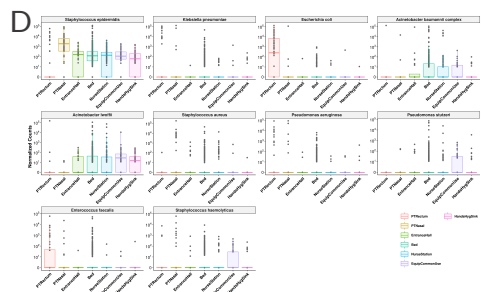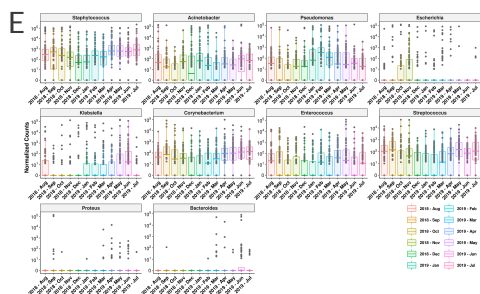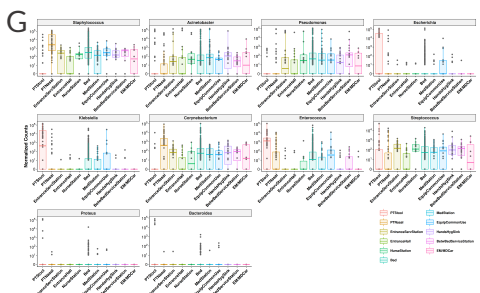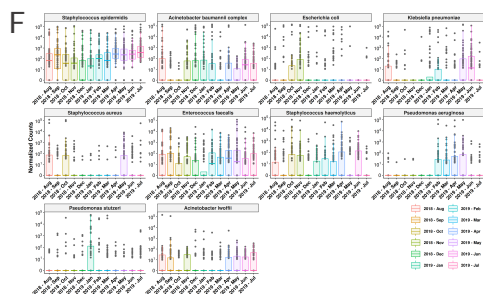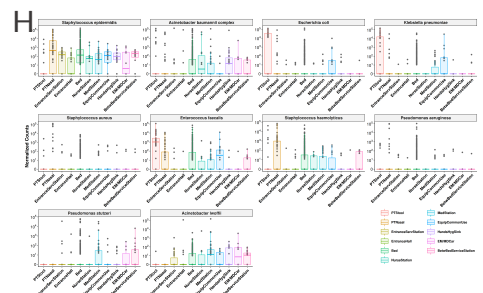

ICU

NICU

**S3 Fig.** Most abundant bacteria detected and classified in Genus and Species. ICU abundant bacteria by month (**A-B**) and by sample location (**C-D**). NICU abundant bacteria by month (**E-F**) and by sample location (**G-H**).
