# Supplementary material for: One year cross-sectional study in adult and neonatal intensive care units reveals the bacterial and antimicrobial resistance genes profiles in patients and hospital surfaces
Source: PubMed Central journal article supplement (PMC7269242; doi:10.1371/journal.pone.0234127), 2020-06-03
Supplement: pone.0234127.s005.pdf [file pone.0234127.s005.pdf]

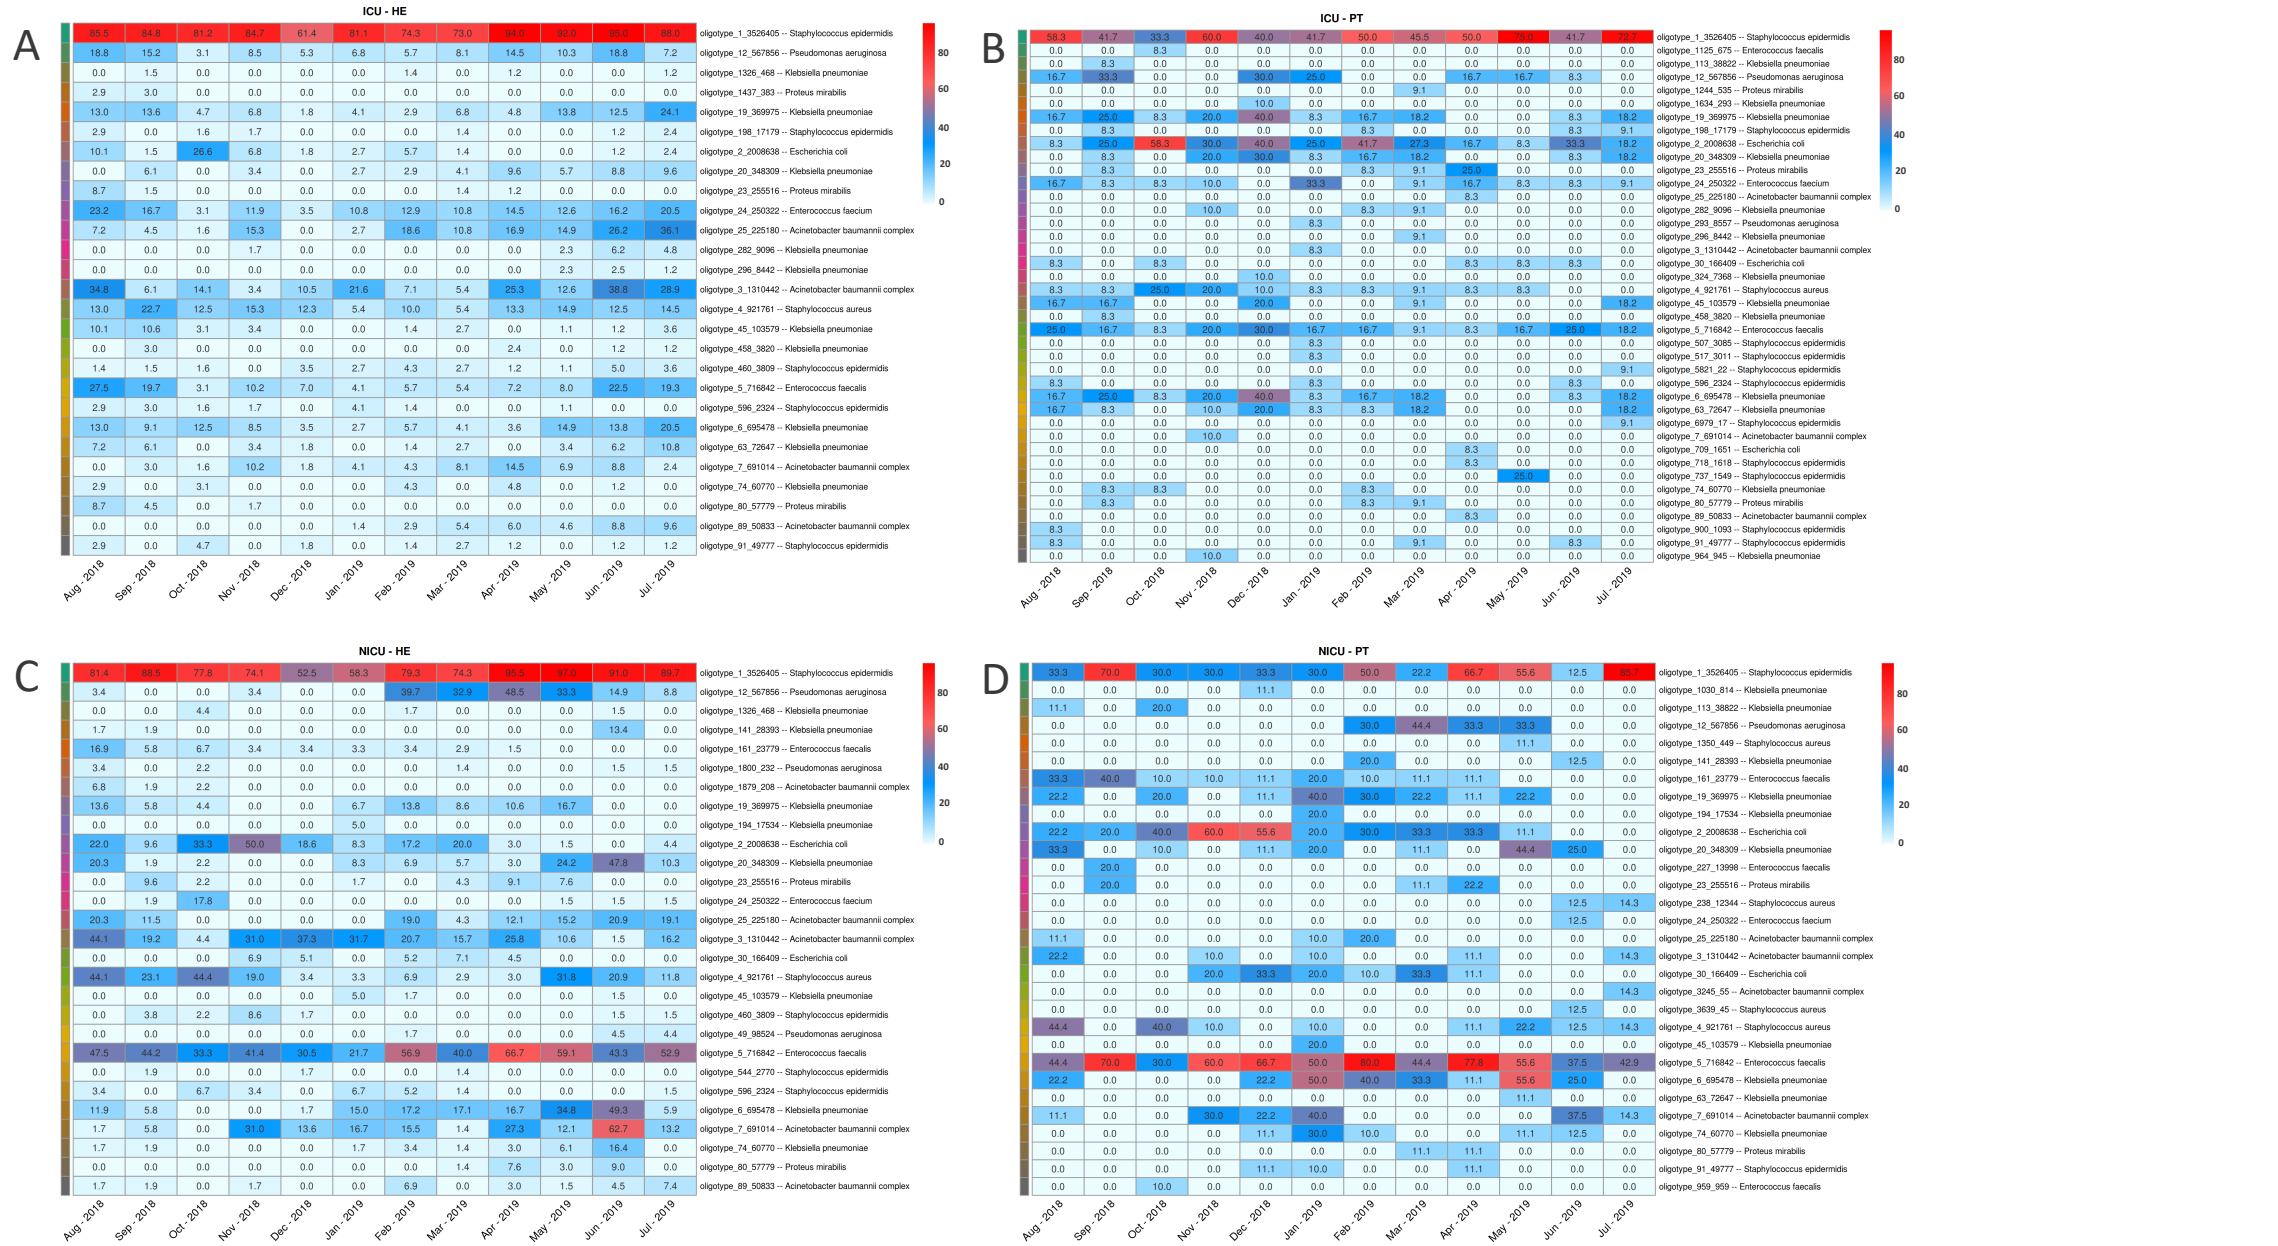

**S5 Fig.** Proportion of positive samples for the most abundant oligotypes in (A) ICU environment, (B) ICU patients, (C) NICU environment and (D) NICU patients. Oligotypes are identified by a unique code, along with its count number (total reads detected along the analysis) - Oligotype\_code\_count, and the bacterial taxonomy attributed by the bioinformatics pipeline. Color scales represents the proportion of positivity in the group of samples.
