# Supplementary material for: One year cross-sectional study in adult and neonatal intensive care units reveals the bacterial and antimicrobial resistance genes profiles in patients and hospital surfaces
Source: PubMed Central journal article supplement (PMC7269242; doi:10.1371/journal.pone.0234127), 2020-06-03
Supplement: pone.0234127.s008.pdf [file pone.0234127.s008.pdf]

**Supplementary table 1.** Sample collection sites

| Source      | Locations                                        | Specific Sites          | ICU Samples | NICU Samples |
|-------------|--------------------------------------------------|-------------------------|-------------|--------------|
| Environment | Equipment Common Use                             | Balance                 | 12          | 12           |
| Environment | Medical and Nurse Stations                       | Bench                   | 10          | 22           |
| Environment | Bed                                              | InfusionBomb            | 69          | 59           |
| Environment | Equipment Common Use                             | MedicCar                | 83          | 14           |
| Environment | Bed / Medical and Nurse Stations                 | MaterialCar             | -           | 10           |
| Environment | Nurse Stations and Entrance Stations             | Computer                | 24          | 24           |
| Environment | Equipment Common Use                             | Dialysis                | 12          | -            |
| Environment | Bed / Medical and Nurse Stations / Entrance Hall | AlcoholDisp             | 106         | 76           |
| Environment | Medical and Nurse Stations                       | SoapDisp                | 24          | 19           |
| Environment | Equipment Common Use                             | Electrocardiograph      | 12          | -            |
| Environment | Equipment Common Use                             | Phototherapy            | -           | 5            |
| Environment | Medical Station                                  | Minifridge              | -           | 12           |
| Environment | Bed                                              | BedRails                | 70          | 3            |
| Environment | Bed                                              | IncubatorDrawer         | -           | 58           |
| Environment | Bed                                              | IncubatorGates          | -           | 58           |
| Environment | Entrance Hall                                    | DoorHandle+ButtonAccess | 24          | 13           |
| Environment | Bed                                              | Monitor (Cardiac)       | 70          | 60           |
| Patient     | Nasal                                            | PTNasal                 | 70          | 59           |
| Patient     | Stool                                            | PTStool                 | -           | 52           |
| Patient     | Rectal                                           | PTRectum                | 68          | -            |
| Environment | Bed                                              | Oximeter                | 70          | 60           |
| Environment | Nurse Station                                    | MedicalRecords          | 24          | 12           |
| Environment | Service Station Between Beds                     | KnobsDrawers            | -           | 12           |
| Environment | Bed                                              | GasRuler                | 70          | 60           |
| Environment | Bed                                              | Respirator              | 70          | 60           |
| Environment | Bed                                              | IVStand                 | 70          | 59           |
| Environment | Nurse Station / Entrance Station                 | Telephone               | 24          | 12           |
| Environment | Medical Station / Hands Hygiene Sink             | Tap                     | 24          | 24           |
| Environment | Equipment Common Use                             | Ultrasound              | 9           | -            |
| Environment | Equipment Common Use                             | EmergencyCar            | -           | 2            |
| Environment | Bed                                              | Screen                  | -           | 8            |
| Environment | Bed                                              | Curtain                 | 23          | -            |
| Environment | Bed                                              | Stethoscope             | 24          | 26           |
| Environment | Bed                                              | Sphygmomanometer        | -           | 25           |
