# Supplementary material for: One year cross-sectional study in adult and neonatal intensive care units reveals the bacterial and antimicrobial resistance genes profiles in patients and hospital surfaces
Source: PubMed Central journal article supplement (PMC7269242; doi:10.1371/journal.pone.0234127), 2020-06-03
Supplement: pone.0234127.s009.pdf [file pone.0234127.s009.pdf]

**Supplementary table 2.** Monthly collected samples and sequencing information.

| Year | Month     | Total Samples* | Seq Run ID | MiSeq Kit | MiSeq Kit Lot        | Total Sequenced reads/Kit** | Mean Sample Coverage* | PhiX Error Rate | Clusters Passing Filter |
|------|-----------|----------------|------------|-----------|----------------------|-----------------------------|-----------------------|-----------------|-------------------------|
| 2018 | August    | 162            | BVT63      | V2-300    | 20259348<br>20271993 | 14,099,567                  | 30,847                | 1.8 %           | 93 %                    |
| 2018 | September | 163            | BWF3K      | V2-300    | 20265835<br>20271993 | 13,685,913                  | 27,903                | 2.6 %           | 94 %                    |
| 2018 | October   | 161            | BWF45      | V2-300    | 20265835<br>20271993 | 13,908,897                  | 30,079                | 3.4 %           | 94 %                    |
| 2018 | November  | 156            | C3H22      | V2-300    | 20282166<br>20287469 | 15,110,301                  | 33,113                | 3.4 %           | 93 %                    |
| 2018 | December  | 155            | C4GW4      | V3-600    | 20286539<br>20298973 | 23,772,082                  | 27,136                | 2.2 %           | 91 %                    |
| 2019 | January   | 162            | C4KLK      | V2-500    | 20286530<br>20295366 | 15,070,932                  | 25,398                | 1.4 %           | 93 %                    |
| 2019 | February  | 163            | C59HL      | V2-300    | 20294299<br>20310032 | 17,036,891                  | 31,176                | 2.0 %           | 92 %                    |
| 2019 | March     | 171            | C68TC      | V2-500    | 20298691<br>20311201 | 14,646,656                  | 30,505                | 1.5 %           | 93 %                    |
| 2019 | April     | 181            | C6YT5      | V2-300    | 20306438<br>20330866 | 13,411,201                  | 31,086                | 1.9 %           | 94 %                    |
| 2019 | May       | 183            | C7L32      | V2-300    | 20306438<br>20316702 | 14,625,019                  | 30,222                | 2.1 %           | 93 %                    |
| 2019 | June      | 179            | CFD4C      | V2-300    | 20343603<br>20320219 | 16,369,195                  | 37,163                | 2.2 %           | 92 %                    |
| 2019 | July      | 178            | CH3HT      | V2-300    | 20351939<br>20358460 | 16,756,668                  | 36,677                | 2.5 %           | 92 %                    |

\* Considering only samples from this project.

\*\* The sequencing kit may contain other samples, not just the ones included in this project.
