# Supplementary material for: One year cross-sectional study in adult and neonatal intensive care units reveals the bacterial and antimicrobial resistance genes profiles in patients and hospital surfaces
Source: PLoS One. 2020 Jun 3;15(6):e0234127. doi: 10.1371/journal.pone.0234127 (PMC7269242; doi:10.1371/journal.pone.0234127)
Supplement: S4 Fig — (PDF) [file pone.0234127.s004.pdf]

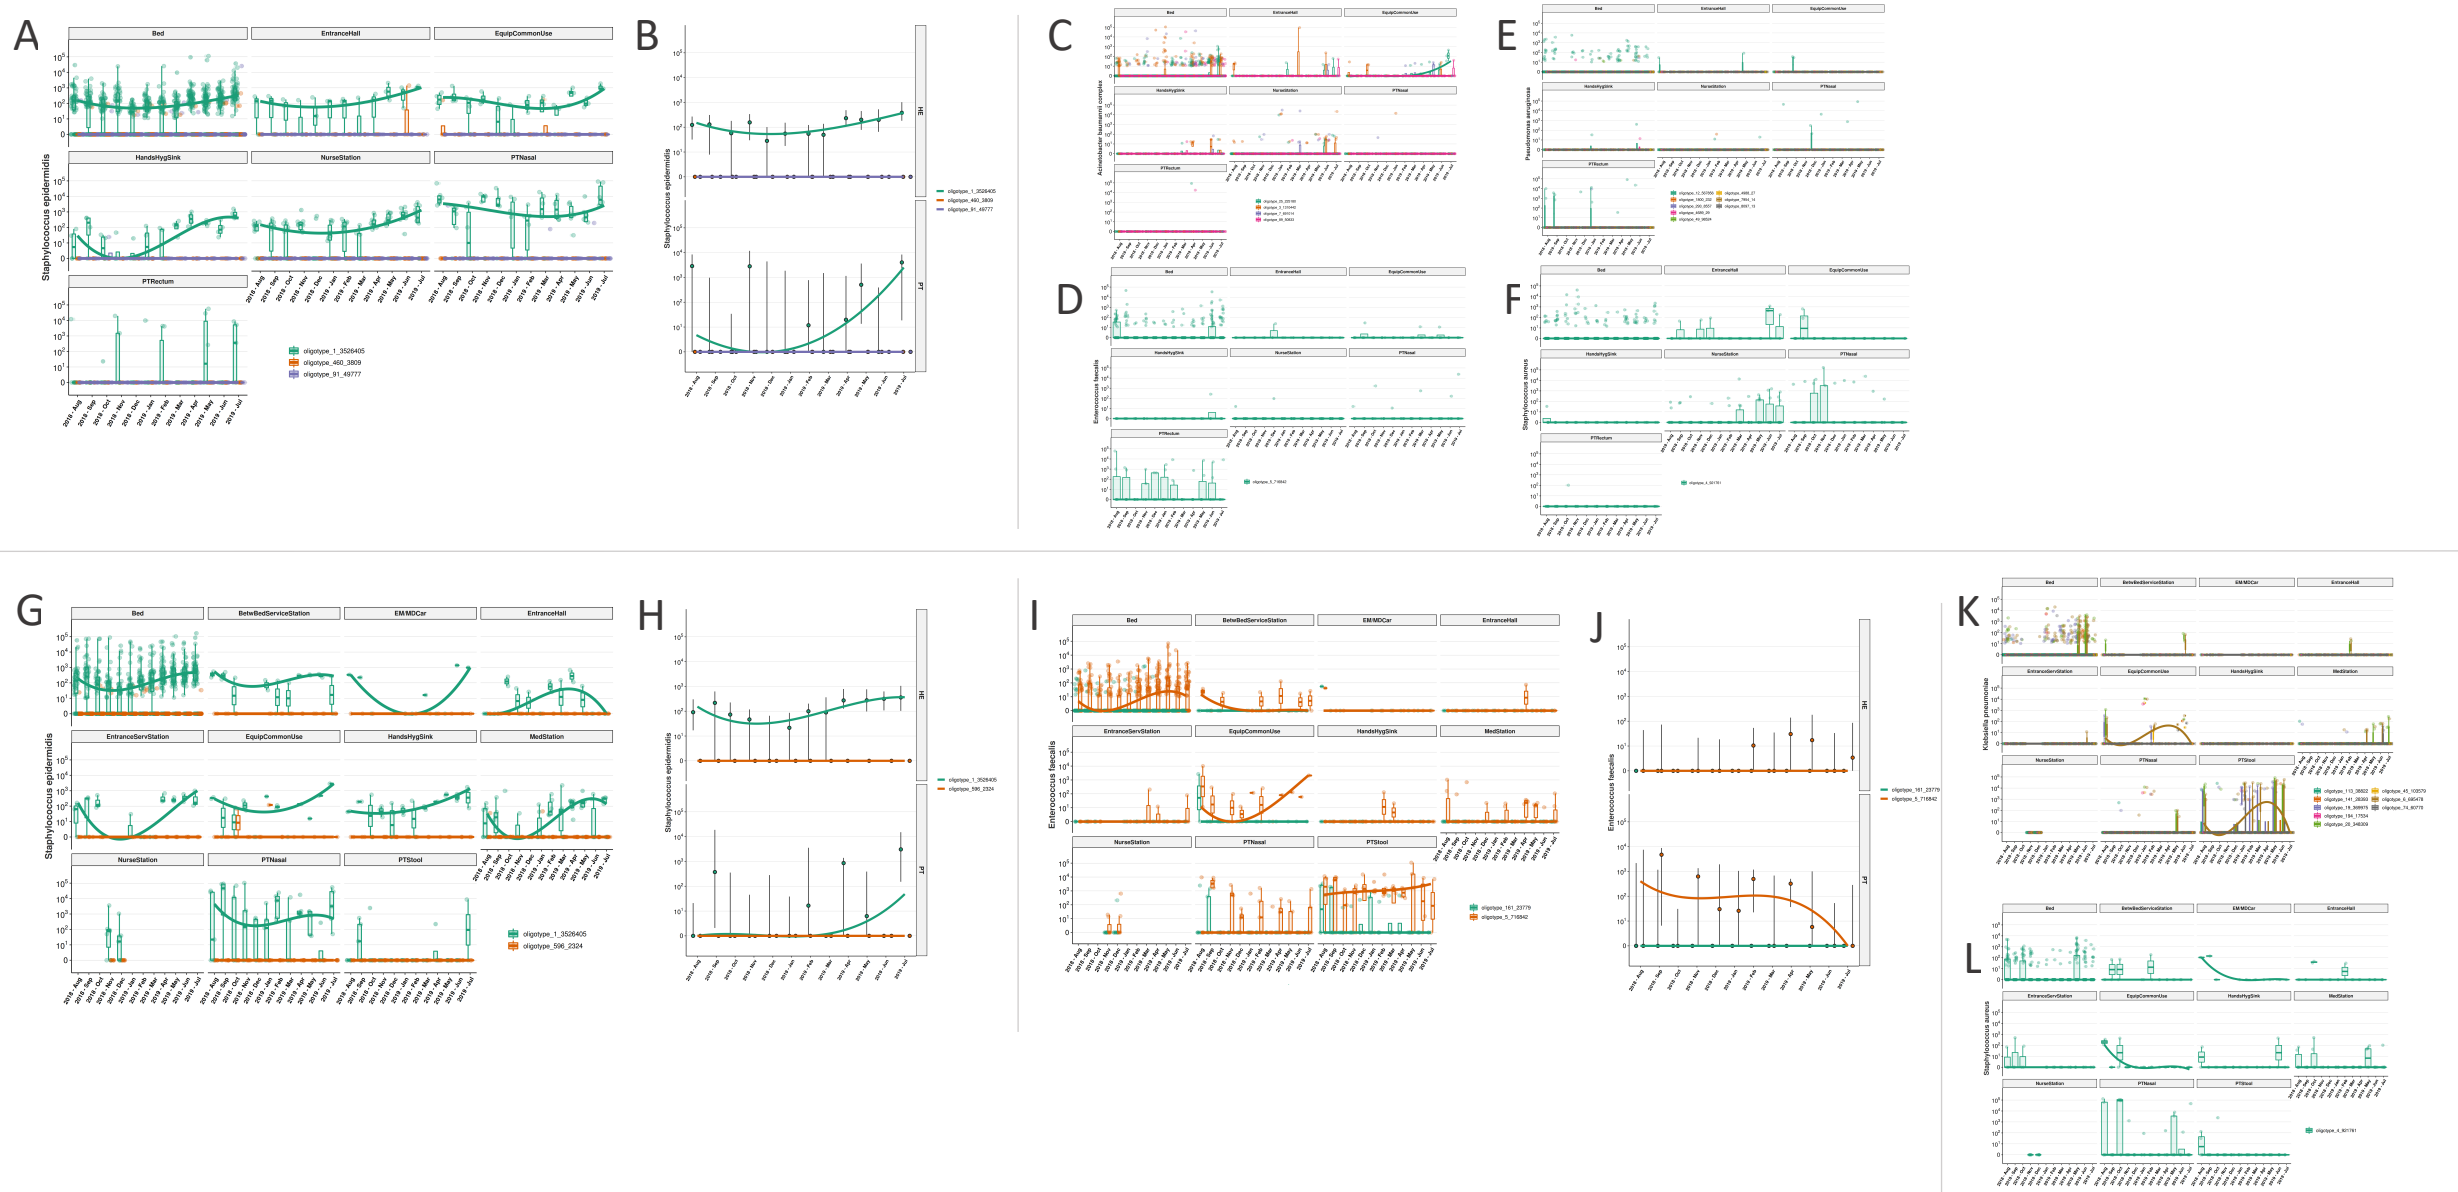

**S4 Fig.** Longitudinal profile of specific bacteria and its most abundant oligotypes found in (A-F) ICU and (G-L) NICU locations. (A) *S. epidermidis* oligotype abundances in different locations and separated (B) in patients (PT) and environmental samples (HE) over the year in the ICU. (C) *A. baumannii* complex (D) *E. faecalis* (E) *P. aeruginosa* and (F) *S. aureus* oligotypes longitudinal abundance profiles in sample collection locations from ICU. (G) *S. epidermidis* oligotypes distributions along the year in NICU locations and their longitudinal profile in (H) patients and environmental samples. (I) *E. faecalis* oligotypes abundances in collected locations and their distributions in (J) patients and environmental samples. (K) *K. pneumoniae* and (L) *S. aureus* oligotypes abundance profiles in NICU locations over the year analyzed. A trend line was added in the boxplots to better visualize the longitudinal profiles over the year.
